# Supplementary material
Source: PubMed Central journal article supplement (PMC3711794)
Supplement: NIHMS437991-supplement-4.pdf [file NIHMS437991-supplement-4.pdf]

Supplementary Table 1. Analytical Data for PBD Binding Peptides

| Peptide | Purity | Column Dimensions | Method                            | FlowRate | Retention Time | Theoretical MW | Observed MW |
|---------|--------|-------------------|-----------------------------------|----------|----------------|----------------|-------------|
| 292     | >90%   | 4.6 × 250 nm      | 5-65% acetonitrile/water/0.1%TFA  | 1ml/min  | 14.6           | 997            | 996.7       |
| 5821    | >90%   | 4.6 × 250 nm      | 15-75% acetonitrile/water/0.1%TFA | 1ml/min  | 16.5           | 1039.1         | 1037.9      |
| 345     | >90%   | 4.6 × 250 nm      | 21-51% acetonitrile/water/0.1%TFA | 1ml/min  | 10.2           | 945.1          | 945.5       |
| 5795    | >90%   | 4.6 × 250 nm      | 5-65% acetonitrile/water/0.1%TFA  | 1ml/min  | 13.5           | 999            | 998.5       |
| 5783    | >90%   | 4.6 × 250 nm      | 5-65% acetonitrile/water/0.1%TFA  | 1ml/min  | 16.1           | 839            | 838.6       |
| 5714    | >90%   | 4.6 × 250 nm      | 5-65% acetonitrile/water/0.1%TFA  | 1ml/min  | 11.1           | 667.6          | 667.4       |
| 5649    | >90%   | 4.6 × 250 nm      | 5-65% acetonitrile/water/0.1%TFA  | 1ml/min  | 12.3           | 720.7          | 720.5       |
| 5781    | >90%   | 4.6 × 250 nm      | 5-65% acetonitrile/water/0.1%TFA  | 1ml/min  | 14.4           | 762.8          | 762.5       |
| 5782    | >90%   | 4.6 × 250 nm      | 5-65% acetonitrile/water/0.1%TFA  | 1ml/min  | 12.2           | 719.7          | 720.4       |
| 5743    | >90%   | 4.6 × 250 nm      | 5-65% acetonitrile/water/0.1%TFA  | 1ml/min  | 12.2           | 745.7          | 746.4       |
| 5744    | >90%   | 4.6 × 250 nm      | 5-65% acetonitrile/water/0.1%TFA  | 1ml/min  | 13.3           | 693.8          | 693.5       |
| 5594    | >90%   | 4.6 × 250 nm      | 5-65% acetonitrile/water/0.1%TFA  | 1ml/min  | 17.1           | 870.82         | 871.25      |
| 5598    | >90%   | 4.6 × 250 nm      | 5-65% acetonitrile/water/0.1%TFA  | 1ml/min  | 16.5           | 853.79         | 853.25      |
| 5603    | >90%   | 4.6 × 250 nm      | 5-65% acetonitrile/water/0.1%TFA  | 1ml/min  | 19.1           | 914.27         | 914.2       |
| 5756    | >90%   | 4.6 × 250 nm      | 5-65% acetonitrile/water/0.1%TFA  | 1ml/min  | 17.9           | 851.6          | 851.5       |
| 5788    | >90%   | 4.6 × 250 nm      | 5-65% acetonitrile/water/0.1%TFA  | 1ml/min  | 17.3           | 799.6          | 799.35      |
| 5827    | >90%   | 4.6 × 250 nm      | 5-65% acetonitrile/water/0.1%TFA  | 1ml/min  | 22.0           | 827.8          | 827.4       |
