# Supplementary material
Source: PubMed Central journal article supplement (PMC3711794)
Supplement: NIHMS437991-supplement-5.pdf [file NIHMS437991-supplement-5.pdf]

Supplementary Table 2. R group definitions for N-capping groups

|      |               |                                                                                     |               |
|------|---------------|-------------------------------------------------------------------------------------|---------------|
| 5756 | 2G1-S[pT]PNGL | 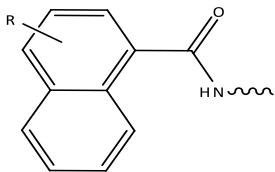 | R = 4-methoxy |
| 5788 | 3G1-S[pT]PNGL |  | R1 = 4-ethyl  |
| 5827 | 3G2-S[pT]PNGL |  | R2=4-butyl    |
