# Supplementary material
Source: PubMed Central journal article supplement (PMC3711794)

Supplementary Figure 1. Dose-response  $IC_{50}$  curves for PBD inhibitors

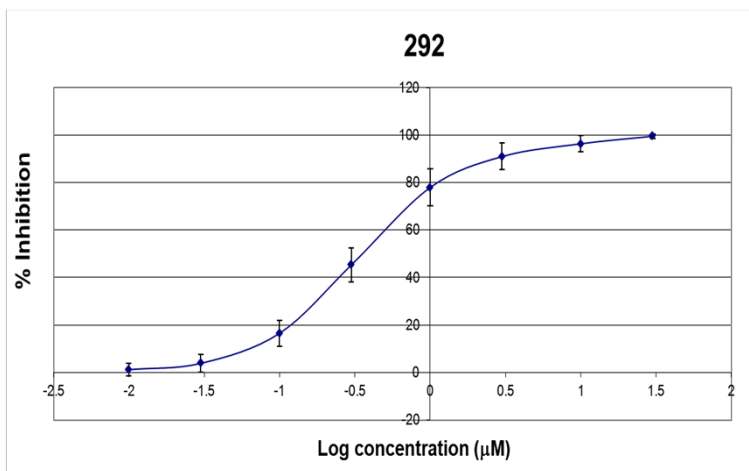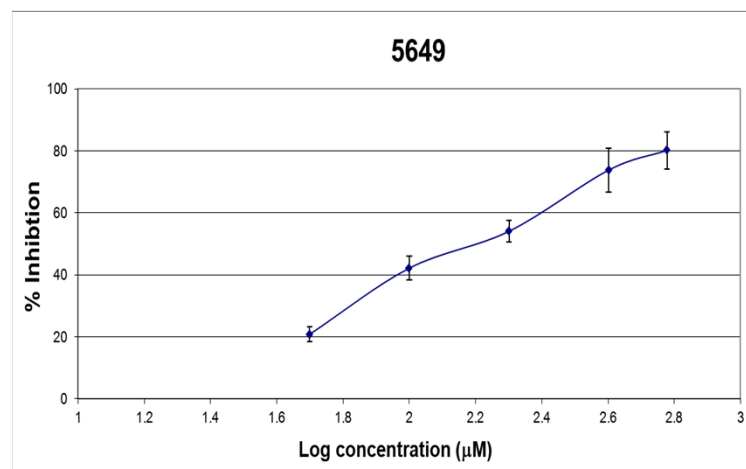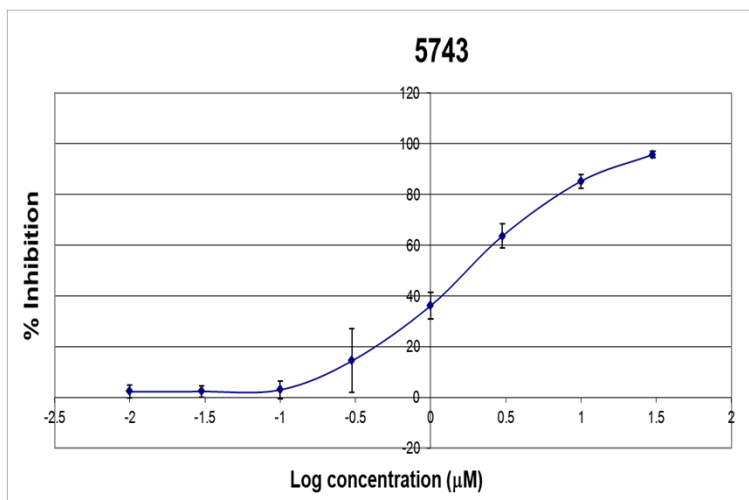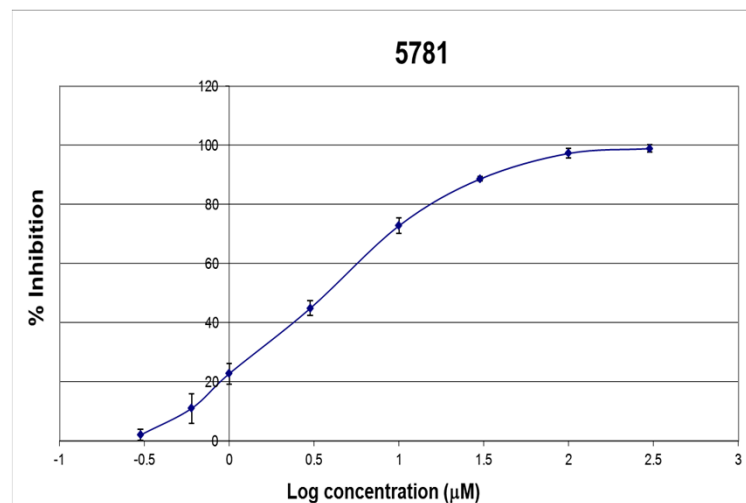

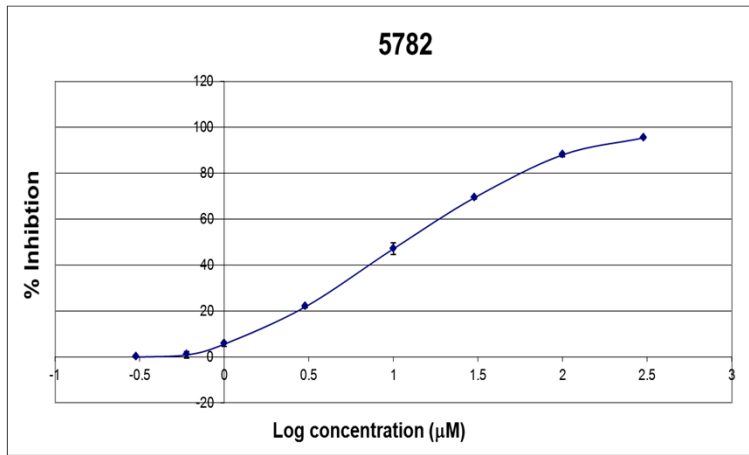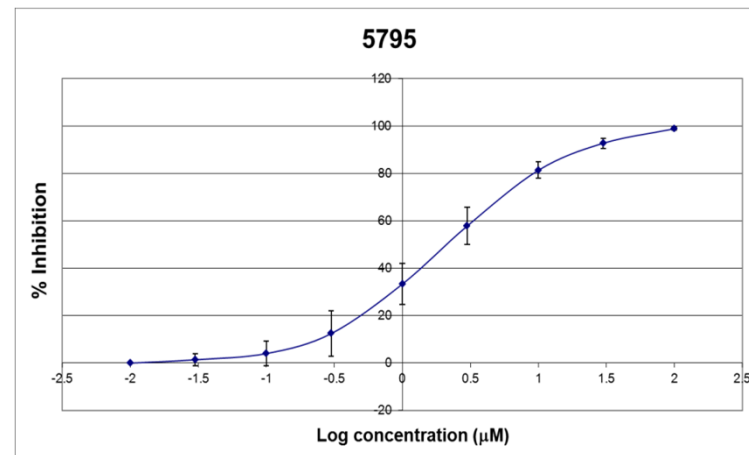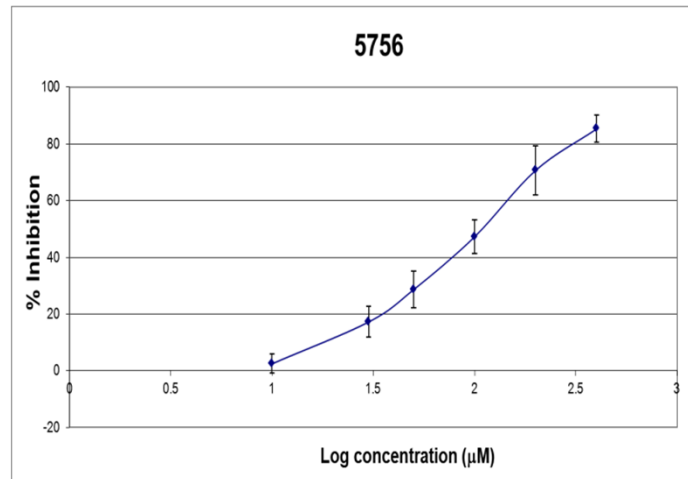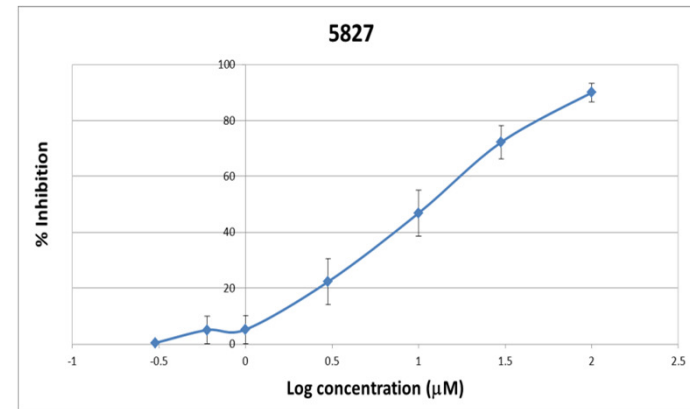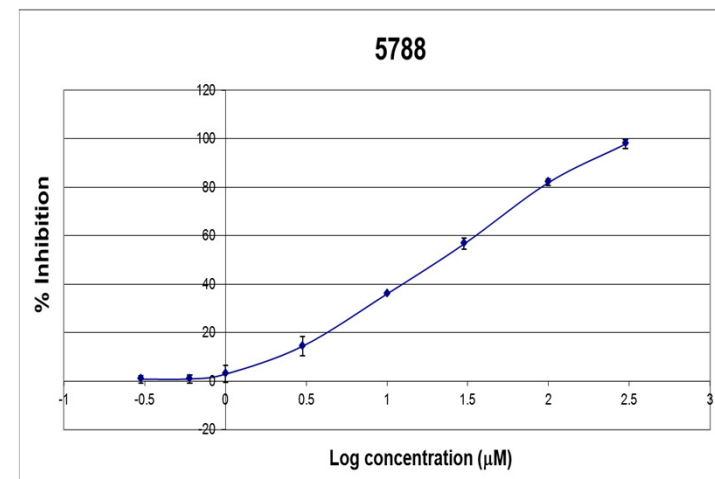

Supplement: NIHMS437991-supplement-2.pdf [file NIHMS437991-supplement-2.pdf]

# Supplementary Figure 2. Scatter plots for Apoptosis/necrosis data

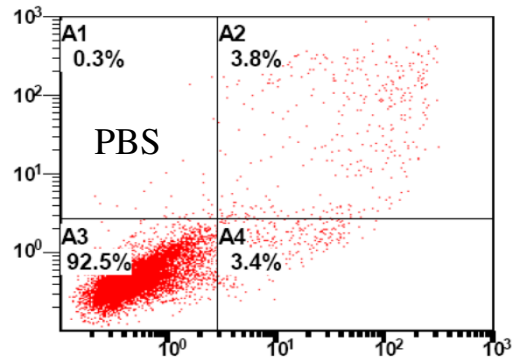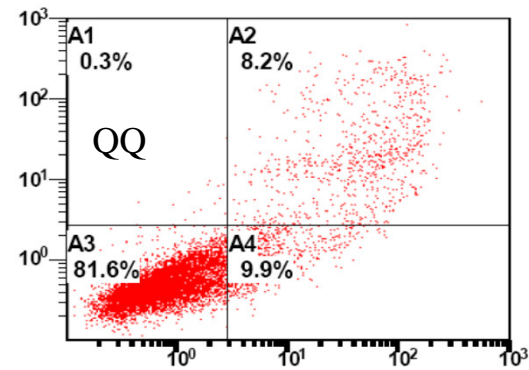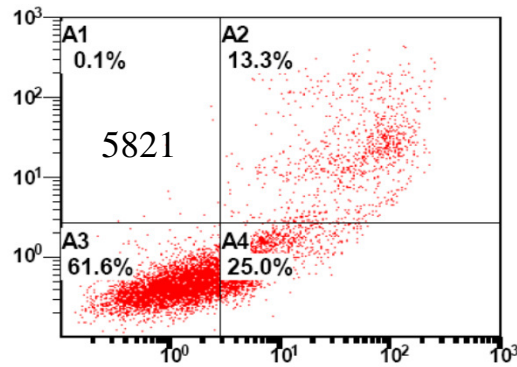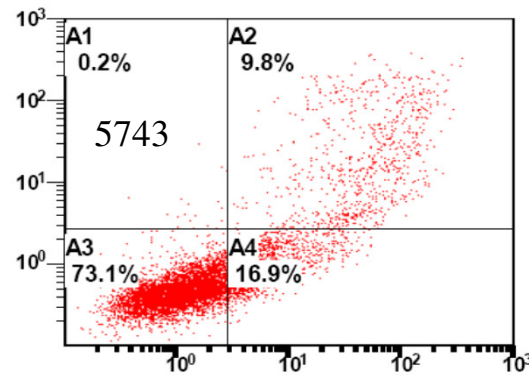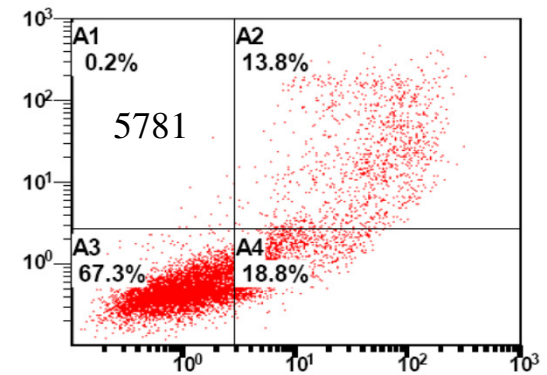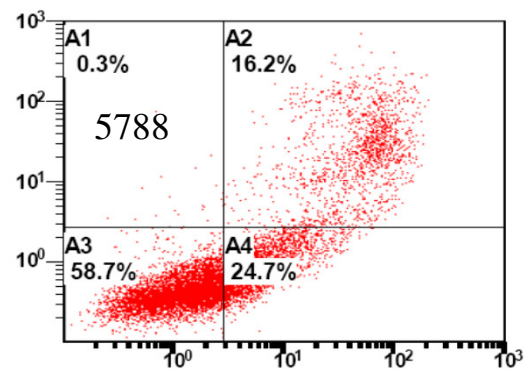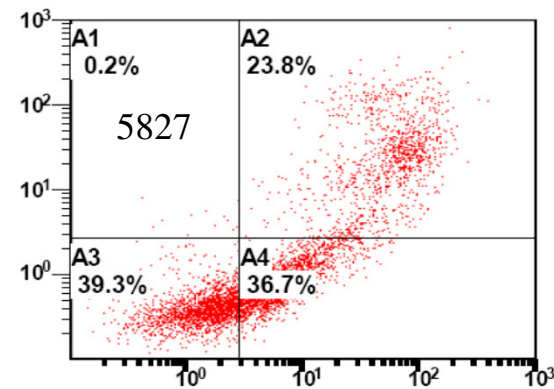

Supplement: NIHMS437991-supplement-3.pdf [file NIHMS437991-supplement-3.pdf]
